# Supplementary material for: Evaluation of Simvastatin as a Disease-Modifying Treatment for Patients With Parkinson Disease: A Randomized Clinical Trial
Source: PubMed Central journal article supplement (PMC9623477; doi:10.1001/jamaneurol.2022.3718), 2022-10-31
Supplement: jamaneurol-e223718-s004.pdf [file jamaneurol-e223718-s004.pdf]

\*First name, last name, and suffix (if applicable) are required and will appear in PubMed.

| <b>*Group Name(s): PD STAT Study Group</b> |                   |                              |                  |                                 |                                          |                                                         |                                                                                            |
|--------------------------------------------|-------------------|------------------------------|------------------|---------------------------------|------------------------------------------|---------------------------------------------------------|--------------------------------------------------------------------------------------------|
| <b>*First Name and Middle Initial(s)</b>   | <b>*Last Name</b> | <b>*Suffix (eg, Jr, III)</b> | Academic Degrees | Institution                     | Location (city, state/province, country) | Role or Contribution, eg, chair, principal investigator | Group (if more than 1 Group listed in the byline) and/or Subgroup (eg, Steering Committee) |
| Jemma                                      | Inches            |                              |                  | University Hospitals Plymouth   | Plymouth, Devon, United Kingdom          |                                                         |                                                                                            |
| Donna                                      | Underwood         |                              |                  | University Hospitals Plymouth   | Plymouth, Devon, United Kingdom          |                                                         |                                                                                            |
| Julie                                      | Frost             |                              |                  | Royal Cornwall Hospital         | Truro, Cornwall, United Kingdom          |                                                         |                                                                                            |
| Ali                                        | James             |                              |                  | Royal Cornwall Hospital         | Truro, Cornwall, United Kingdom          |                                                         |                                                                                            |
| Christine                                  | Schofield         |                              |                  | Royal Cornwall Hospital         | Truro, Cornwall, United Kingdom          |                                                         |                                                                                            |
| Rob                                        | James             |                              |                  | Royal Devon and Exeter Hospital | Exeter, Devon, United Kingdom            |                                                         |                                                                                            |
| Clare                                      | O'Reilly          |                              |                  | Royal Devon and Exeter Hospital | Exeter, Devon, United Kingdom            |                                                         |                                                                                            |
| Ray                                        | Sheridan          |                              |                  | Royal Devon and Exeter Hospital | Exeter, Devon, United Kingdom            |                                                         |                                                                                            |
| Sarah                                      | Statton           |                              |                  | Royal Devon and Exeter Hospital | Exeter, Devon, United Kingdom            |                                                         |                                                                                            |
| Anita                                      | Goff              |                              |                  | Musgrove Park Hospital          | Taunton, Somerset, United Kingdom        |                                                         |                                                                                            |
| Tamlyn                                     | Russell           |                              |                  | Musgrove Park Hospital          | Taunton, Somerset, United Kingdom        |                                                         |                                                                                            |
| Alison                                     | Whitcher          |                              |                  | Musgrove Park Hospital          | Taunton, Somerset, United Kingdom        |                                                         |                                                                                            |
| Sarah                                      | Craw              |                              |                  | Yeovil District Hospital        | Yeovil, Somerset, United Kingdom         |                                                         |                                                                                            |
| Alison                                     | Lewis             |                              |                  | Yeovil District Hospital        | Yeovil, Somerset, United Kingdom         |                                                         |                                                                                            |
| Rani                                       | Sophia            |                              |                  | Yeovil District Hospital        | Yeovil, Somerset, United Kingdom         |                                                         |                                                                                            |

## Supplemental Online Content: Nonauthor Collaborators

\*First name, last name, and suffix (if applicable) are required and will appear in PubMed.

| *First Name and Middle Initial(s) | *Last Name        | *Suffix (eg, Jr, III) | Academic Degrees | Institution                | Location (city, state/province, country) | Role or Contribution, eg, chair, principal investigator | Group (if more than 1 Group listed in the byline) and/or Subgroup (eg, Steering Committee) |
|-----------------------------------|-------------------|-----------------------|------------------|----------------------------|------------------------------------------|---------------------------------------------------------|--------------------------------------------------------------------------------------------|
| Khaled                            | Amar              |                       |                  | Royal Bournemouth Hospital | Bournemouth, Dorset, United Kingdom      |                                                         |                                                                                            |
| Rochelle                          | Hernandez         |                       |                  | Royal Bournemouth Hospital | Bournemouth, Dorset, United Kingdom      |                                                         |                                                                                            |
| Alison                            | Pitcher           |                       |                  | Royal Bournemouth Hospital | Bournemouth, Dorset, United Kingdom      |                                                         |                                                                                            |
| Samantha                          | Carvey            |                       |                  | Royal United Hospital      | Bath, Somerset, United Kingdom           |                                                         |                                                                                            |
| Ruth                              | Hamlin            |                       |                  | Royal United Hospital      | Bath, Somerset, United Kingdom           |                                                         |                                                                                            |
| Veronica                          | Lyell             |                       |                  | Royal United Hospital      | Bath, Somerset, United Kingdom           |                                                         |                                                                                            |
| Louisa                            | Aubry             |                       |                  | St Peters Hospital         | Chertsey, Surrey, United Kingdom         |                                                         |                                                                                            |
| Gillian                           | Carey             |                       |                  | St Peters Hospital         | Chertsey, Surrey, United Kingdom         |                                                         |                                                                                            |
| Jan                               | Coebergh          |                       |                  | St Peters Hospital         | Chertsey, Surrey, United Kingdom         |                                                         |                                                                                            |
| Idah                              | Mojela            |                       |                  | Charing Cross Hospital     | London, Greater London, United Kingdom   |                                                         |                                                                                            |
| Sophie                            | Molloy            |                       |                  | Charing Cross Hospital     | London, Greater London, United Kingdom   |                                                         |                                                                                            |
| Yolanda                           | Berceruelo Bergaz |                       |                  | Royal Free Hospital        | London, Greater London, United Kingdom   |                                                         |                                                                                            |
| Bintou                            | Camera            |                       |                  | Royal Free Hospital        | London, Greater London, United Kingdom   |                                                         |                                                                                            |
| Philip                            | Campbell          |                       |                  | Royal Free Hospital        | London, Greater London, United Kingdom   |                                                         |                                                                                            |
| Huw                               | Morris            |                       |                  | Royal Free Hospital        | London, Greater London, United Kingdom   |                                                         |                                                                                            |
| Tinashe                           | Samakomva         |                       |                  | Royal Free Hospital        | London, Greater London, United Kingdom   |                                                         |                                                                                            |

## Supplemental Online Content: Nonauthor Collaborators

\*First name, last name, and suffix (if applicable) are required and will appear in PubMed.

| *First Name and Middle Initial(s) | *Last Name  | *Suffix (eg, Jr, III) | Academic Degrees | Institution                             | Location (city, state/province, country)  | Role or Contribution, eg, chair, principal investigator | Group (if more than 1 Group listed in the byline) and/or Subgroup (eg, Steering Committee) |
|-----------------------------------|-------------|-----------------------|------------------|-----------------------------------------|-------------------------------------------|---------------------------------------------------------|--------------------------------------------------------------------------------------------|
| Anette                            | Schrag      |                       |                  | Royal Free Hospital                     | London, Greater London, United Kingdom    |                                                         |                                                                                            |
| Sarah                             | Fuller      |                       |                  | Queen's Hospital                        | Romford, Greater London, United Kingdom   |                                                         |                                                                                            |
| Anjum                             | Misbahuddin |                       |                  | Queen's Hospital                        | Romford, Greater London, United Kingdom   |                                                         |                                                                                            |
| Laura                             | Parker      |                       |                  | Queen's Hospital                        | Romford, Greater London, United Kingdom   |                                                         |                                                                                            |
| Elisa                             | Visentin    |                       |                  | Queen's Hospital                        | Romford, Greater London, United Kingdom   |                                                         |                                                                                            |
| Stephanie                         | Gallehawk   |                       |                  | John Radcliffe Hospital                 | Oxford, Oxfordshire, United Kingdom       |                                                         |                                                                                            |
| Jacqueline                        | Rudd        |                       |                  | John Radcliffe Hospital                 | Oxford, Oxfordshire, United Kingdom       |                                                         |                                                                                            |
| Sudhir                            | Singh       |                       |                  | John Radcliffe Hospital                 | Oxford, Oxfordshire, United Kingdom       |                                                         |                                                                                            |
| Sarsha                            | Wilson      |                       |                  | John Radcliffe Hospital                 | Oxford, Oxfordshire, United Kingdom       |                                                         |                                                                                            |
| Julie                             | Creven      |                       |                  | Luton and Dunstable University Hospital | Luton, Bedfordshire, United Kingdom       |                                                         |                                                                                            |
| Yvonne                            | Croucher    |                       |                  | Luton and Dunstable University Hospital | Luton, Bedfordshire, United Kingdom       |                                                         |                                                                                            |
| Anette                            | Schrag      |                       |                  | Luton and Dunstable University Hospital | Luton, Bedfordshire, United Kingdom       |                                                         |                                                                                            |
| Susan                             | Tluk        |                       |                  | Luton and Dunstable University Hospital | Luton, Bedfordshire, United Kingdom       |                                                         |                                                                                            |
| Paul                              | Watts       |                       |                  | Luton and Dunstable University Hospital | Luton, Bedfordshire, United Kingdom       |                                                         |                                                                                            |
| Simone                            | Hargreaves  |                       |                  | Addenbrooke's Hospital                  | Cambridge, Cambridgeshire, United Kingdom |                                                         |                                                                                            |

## Supplemental Online Content: Nonauthor Collaborators

\*First name, last name, and suffix (if applicable) are required and will appear in PubMed.

| <b>*First Name and Middle Initial(s)</b> | <b>*Last Name</b> | <b>*Suffix (eg, Jr, III)</b> | Academic Degrees | Institution                | Location (city, state/province, country)    | Role or Contribution, eg, chair, principal investigator | Group (if more than 1 Group listed in the byline) and/or Subgroup (eg, Steering Committee) |
|------------------------------------------|-------------------|------------------------------|------------------|----------------------------|---------------------------------------------|---------------------------------------------------------|--------------------------------------------------------------------------------------------|
| Danielle                                 | Johnson           |                              |                  | Addenbrooke's Hospital     | Cambridge, Cambridgeshire, United Kingdom   |                                                         |                                                                                            |
| Lucy                                     | Worboys           |                              |                  | Addenbrooke's Hospital     | Cambridge, Cambridgeshire, United Kingdom   |                                                         |                                                                                            |
| Paul                                     | Worth             |                              |                  | Addenbrooke's Hospital     | Cambridge, Cambridgeshire, United Kingdom   |                                                         |                                                                                            |
| Judith                                   | Brooke            |                              |                  | Salford Royal Hospital     | Salford, Greater Manchester, United Kingdom |                                                         |                                                                                            |
| Christopher                              | Kobylecki         |                              |                  | Salford Royal Hospital     | Salford, Greater Manchester, United Kingdom |                                                         |                                                                                            |
| Victoria                                 | Parker            |                              |                  | Salford Royal Hospital     | Salford, Greater Manchester, United Kingdom |                                                         |                                                                                            |
| Judith                                   | Brooke            |                              |                  | Fairfield General Hospital | Bury, Greater Manchester, United Kingdom    |                                                         |                                                                                            |
| Linda                                    | Johnson           |                              |                  | Fairfield General Hospital | Bury, Greater Manchester, United Kingdom    |                                                         |                                                                                            |
| Rosane                                   | Joseph            |                              |                  | Fairfield General Hospital | Bury, Greater Manchester, United Kingdom    |                                                         |                                                                                            |
| Julie                                    | Melville          |                              |                  | Fairfield General Hospital | Bury, Greater Manchester, United Kingdom    |                                                         |                                                                                            |

## Supplemental Online Content: Nonauthor Collaborators

\*First name, last name, and suffix (if applicable) are required and will appear in PubMed.

| *First Name and Middle Initial(s) | *Last Name | *Suffix (eg, Jr, III) | Academic Degrees | Institution                                         | Location (city, state/province, country)           | Role or Contribution, eg, chair, principal investigator | Group (if more than 1 Group listed in the byline) and/or Subgroup (eg, Steering Committee) |
|-----------------------------------|------------|-----------------------|------------------|-----------------------------------------------------|----------------------------------------------------|---------------------------------------------------------|--------------------------------------------------------------------------------------------|
| Jason                             | Raw        |                       |                  | Fairfield General Hospital                          | Bury, Greater Manchester, United Kingdom           |                                                         |                                                                                            |
| Janice                            | Birt       |                       |                  | Royal Preston Hospital                              | Preston, Lancashire, United Kingdom                |                                                         |                                                                                            |
| Marianne                          | Hare       |                       |                  | Royal Preston Hospital                              | Preston, Lancashire, United Kingdom                |                                                         |                                                                                            |
| Saifuddin                         | Shaik      |                       |                  | Royal Preston Hospital                              | Preston, Lancashire, United Kingdom                |                                                         |                                                                                            |
| Jane                              | Alty       |                       |                  | Leeds General Infirmary                             | Leeds, West Yorkshire, United Kingdom              |                                                         |                                                                                            |
| Jeremy                            | Cosgrove   |                       |                  | Leeds General Infirmary                             | Leeds, West Yorkshire, United Kingdom              |                                                         |                                                                                            |
| David                             | Burn       |                       |                  | Clinical Ageing Research Unit, Newcastle University | Newcastle upon Tyne, Tyne and Wear, United Kingdom |                                                         |                                                                                            |
| Angela                            | Green      |                       |                  | Clinical Ageing Research Unit, Newcastle University | Newcastle upon Tyne, Tyne and Wear, United Kingdom |                                                         |                                                                                            |
| Ann                               | McNichol   |                       |                  | Clinical Ageing Research Unit, Newcastle University | Newcastle upon Tyne, Tyne and Wear, United Kingdom |                                                         |                                                                                            |
| Nicola                            | Pavese     |                       |                  | Clinical Ageing Research Unit, Newcastle University | Newcastle upon Tyne, Tyne and Wear, United Kingdom |                                                         |                                                                                            |
| Helen                             | Pilkington |                       |                  | Clinical Ageing Research Unit, Newcastle University | Newcastle upon Tyne, Tyne and Wear, United Kingdom |                                                         |                                                                                            |
| Maria                             | Price      |                       |                  | Clinical Ageing Research Unit, Newcastle University | Newcastle upon Tyne, Tyne and Wear, United Kingdom |                                                         |                                                                                            |

## Supplemental Online Content: Nonauthor Collaborators

\*First name, last name, and suffix (if applicable) are required and will appear in PubMed.

| *First Name and Middle Initial(s) | *Last Name   | *Suffix (eg, Jr, III) | Academic Degrees | Institution                                         | Location (city, state/province, country)           | Role or Contribution, eg, chair, principal investigator | Group (if more than 1 Group listed in the byline) and/or Subgroup (eg, Steering Committee) |
|-----------------------------------|--------------|-----------------------|------------------|-----------------------------------------------------|----------------------------------------------------|---------------------------------------------------------|--------------------------------------------------------------------------------------------|
| Kathryn                           | Walker       |                       |                  | Clinical Ageing Research Unit, Newcastle University | Newcastle upon Tyne, Tyne and Wear, United Kingdom |                                                         |                                                                                            |
| Ray                               | Chaudhuri    |                       |                  | King's College Hospital                             | London, Greater London, United Kingdom             |                                                         |                                                                                            |
| Aleksandra                        | Podlewska    |                       |                  | King's College Hospital                             | London, Greater London, United Kingdom             |                                                         |                                                                                            |
| Prashanth                         | Reddy        |                       |                  | King's College Hospital                             | London, Greater London, United Kingdom             |                                                         |                                                                                            |
| Dhaval                            | Trivedi      |                       |                  | King's College Hospital                             | London, Greater London, United Kingdom             |                                                         |                                                                                            |
| Oliver                            | Bandmann     |                       |                  | Royal Hallamshire Hospital                          | Sheffield, South Yorkshire, United Kingdom         |                                                         |                                                                                            |
| Rosie                             | Clegg        |                       |                  | Royal Hallamshire Hospital                          | Sheffield, South Yorkshire, United Kingdom         |                                                         |                                                                                            |
| Grace                             | Cole         |                       |                  | Royal Hallamshire Hospital                          | Sheffield, South Yorkshire, United Kingdom         |                                                         |                                                                                            |
| Anna                              | Emery        |                       |                  | Royal Hallamshire Hospital                          | Sheffield, South Yorkshire, United Kingdom         |                                                         |                                                                                            |
| Vaclav                            | Dostal       |                       |                  | Norfolk and Norwich Hospital                        | Norwich, Norfolk, United Kingdom                   |                                                         |                                                                                            |
| Jodie                             | Graham       |                       |                  | Norfolk and Norwich Hospital                        | Norwich, Norfolk, United Kingdom                   |                                                         |                                                                                            |
| Jocelyn                           | Keshet-Price |                       |                  | Norfolk and Norwich Hospital                        | Norwich, Norfolk, United Kingdom                   |                                                         |                                                                                            |
| Godwin                            | Mamutse      |                       |                  | Norfolk and Norwich Hospital                        | Norwich, Norfolk, United Kingdom                   |                                                         |                                                                                            |

## Supplemental Online Content: Nonauthor Collaborators

\*First name, last name, and suffix (if applicable) are required and will appear in PubMed.

| *First Name and Middle Initial(s) | *Last Name | *Suffix (eg, Jr, III) | Academic Degrees | Institution                  | Location (city, state/province, country)   | Role or Contribution, eg, chair, principal investigator | Group (if more than 1 Group listed in the byline) and/or Subgroup (eg, Steering Committee) |
|-----------------------------------|------------|-----------------------|------------------|------------------------------|--------------------------------------------|---------------------------------------------------------|--------------------------------------------------------------------------------------------|
| Alex                              | Miller-Fik |                       |                  | Norfolk and Norwich Hospital | Norwich, Norfolk, United Kingdom           |                                                         |                                                                                            |
| Alison                            | Wiltshire  |                       |                  | Norfolk and Norwich Hospital | Norwich, Norfolk, United Kingdom           |                                                         |                                                                                            |
| Catherine                         | Wright     |                       |                  | Norfolk and Norwich Hospital | Norwich, Norfolk, United Kingdom           |                                                         |                                                                                            |
| Kathryn                           | Dixon      |                       |                  | Rotherham General Hospital   | Rotherham, South Yorkshire, United Kingdom |                                                         |                                                                                            |
| Ahmed                             | Abdelhafiz |                       |                  | Rotherham General Hospital   | Rotherham, South Yorkshire, United Kingdom |                                                         |                                                                                            |
| Joanne                            | Rose       |                       |                  | Rotherham General Hospital   | Rotherham, South Yorkshire, United Kingdom |                                                         |                                                                                            |
