# Supplementary material for: Evaluation of Simvastatin as a Disease-Modifying Treatment for Patients With Parkinson Disease: A Randomized Clinical Trial
Source: PubMed Central journal article supplement (PMC9623477; doi:10.1001/jamaneurol.2022.3718), 2022-10-31
Supplement: jamaneurol-e223718-s005.pdf [file jamaneurol-e223718-s005.pdf]

## Data Sharing Statement

Stevens. Evaluation of Simvastatin as a Neuroprotective Treatment for Patients With Parkinson Disease. *JAMA Neurol.* Published October 31, 2022. doi:10.1001/jamaneurol.2022.3718

### Data

**Data available:** Yes

**Data types:** Deidentified participant data

**How to access data:** By request to the data custodian/sponsor representative ([crollinson@nhs.net](mailto:crollinson@nhs.net)).

**When available:** With publication

### Supporting Documents

**Document types:** None

### Additional Information

**Who can access the data:** Researchers undertaking ethically approved purposes and on execution of a valid data sharing agreement.

**Types of analyses:** Specified ethically approved purpose.

**Mechanisms of data availability:** With a signed valid data sharing agreement.
